# Supplementary material for: A shape changing tandem Rh(CNC) catalyst: preparation of bicyclo[4.2.0]octa-1,5,7-trienes from terminal aryl alkynes
Source: Royal Society of Chemistry journal article supplement (doi:10.1039/c9sc06153c), 2020-01-01
Supplement: c9sc06153c2.pdf [file c9sc06153c2.pdf]

# A Transforming Rhodium Catalyst for "One-pot" Multistep Organic Synthesis

Synthesis of complex organic molecules using traditional multistep procedures is tedious and wasteful

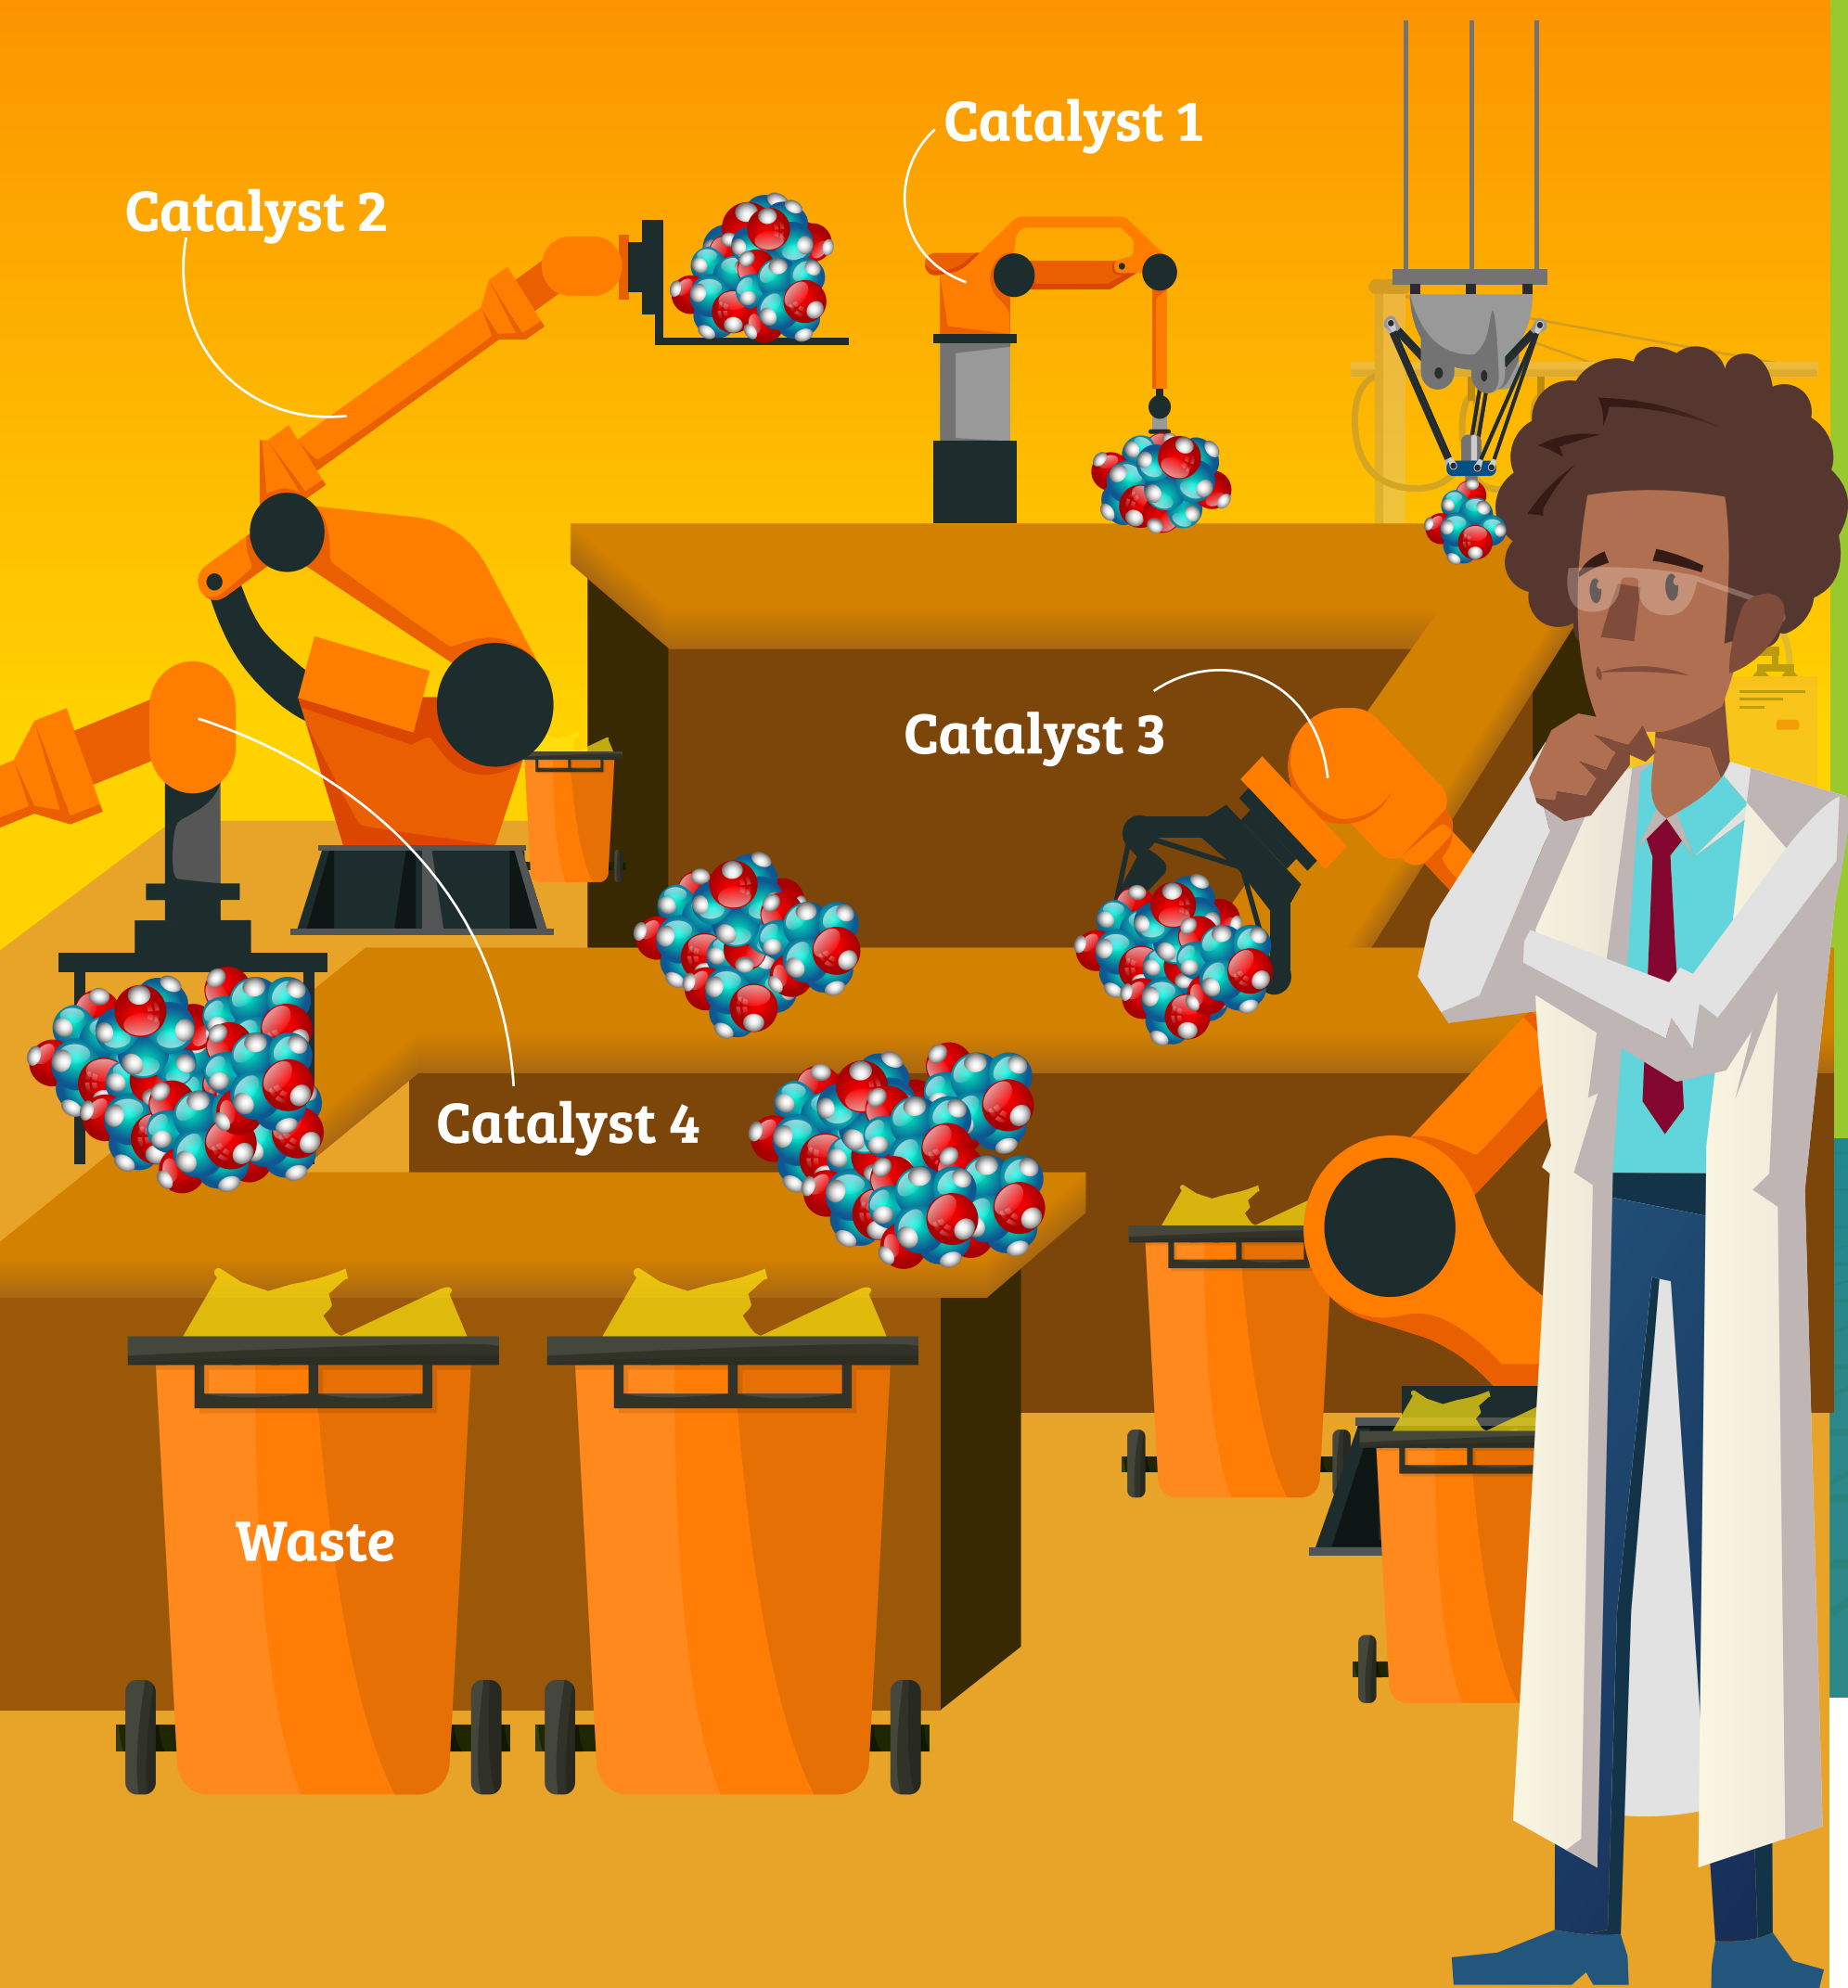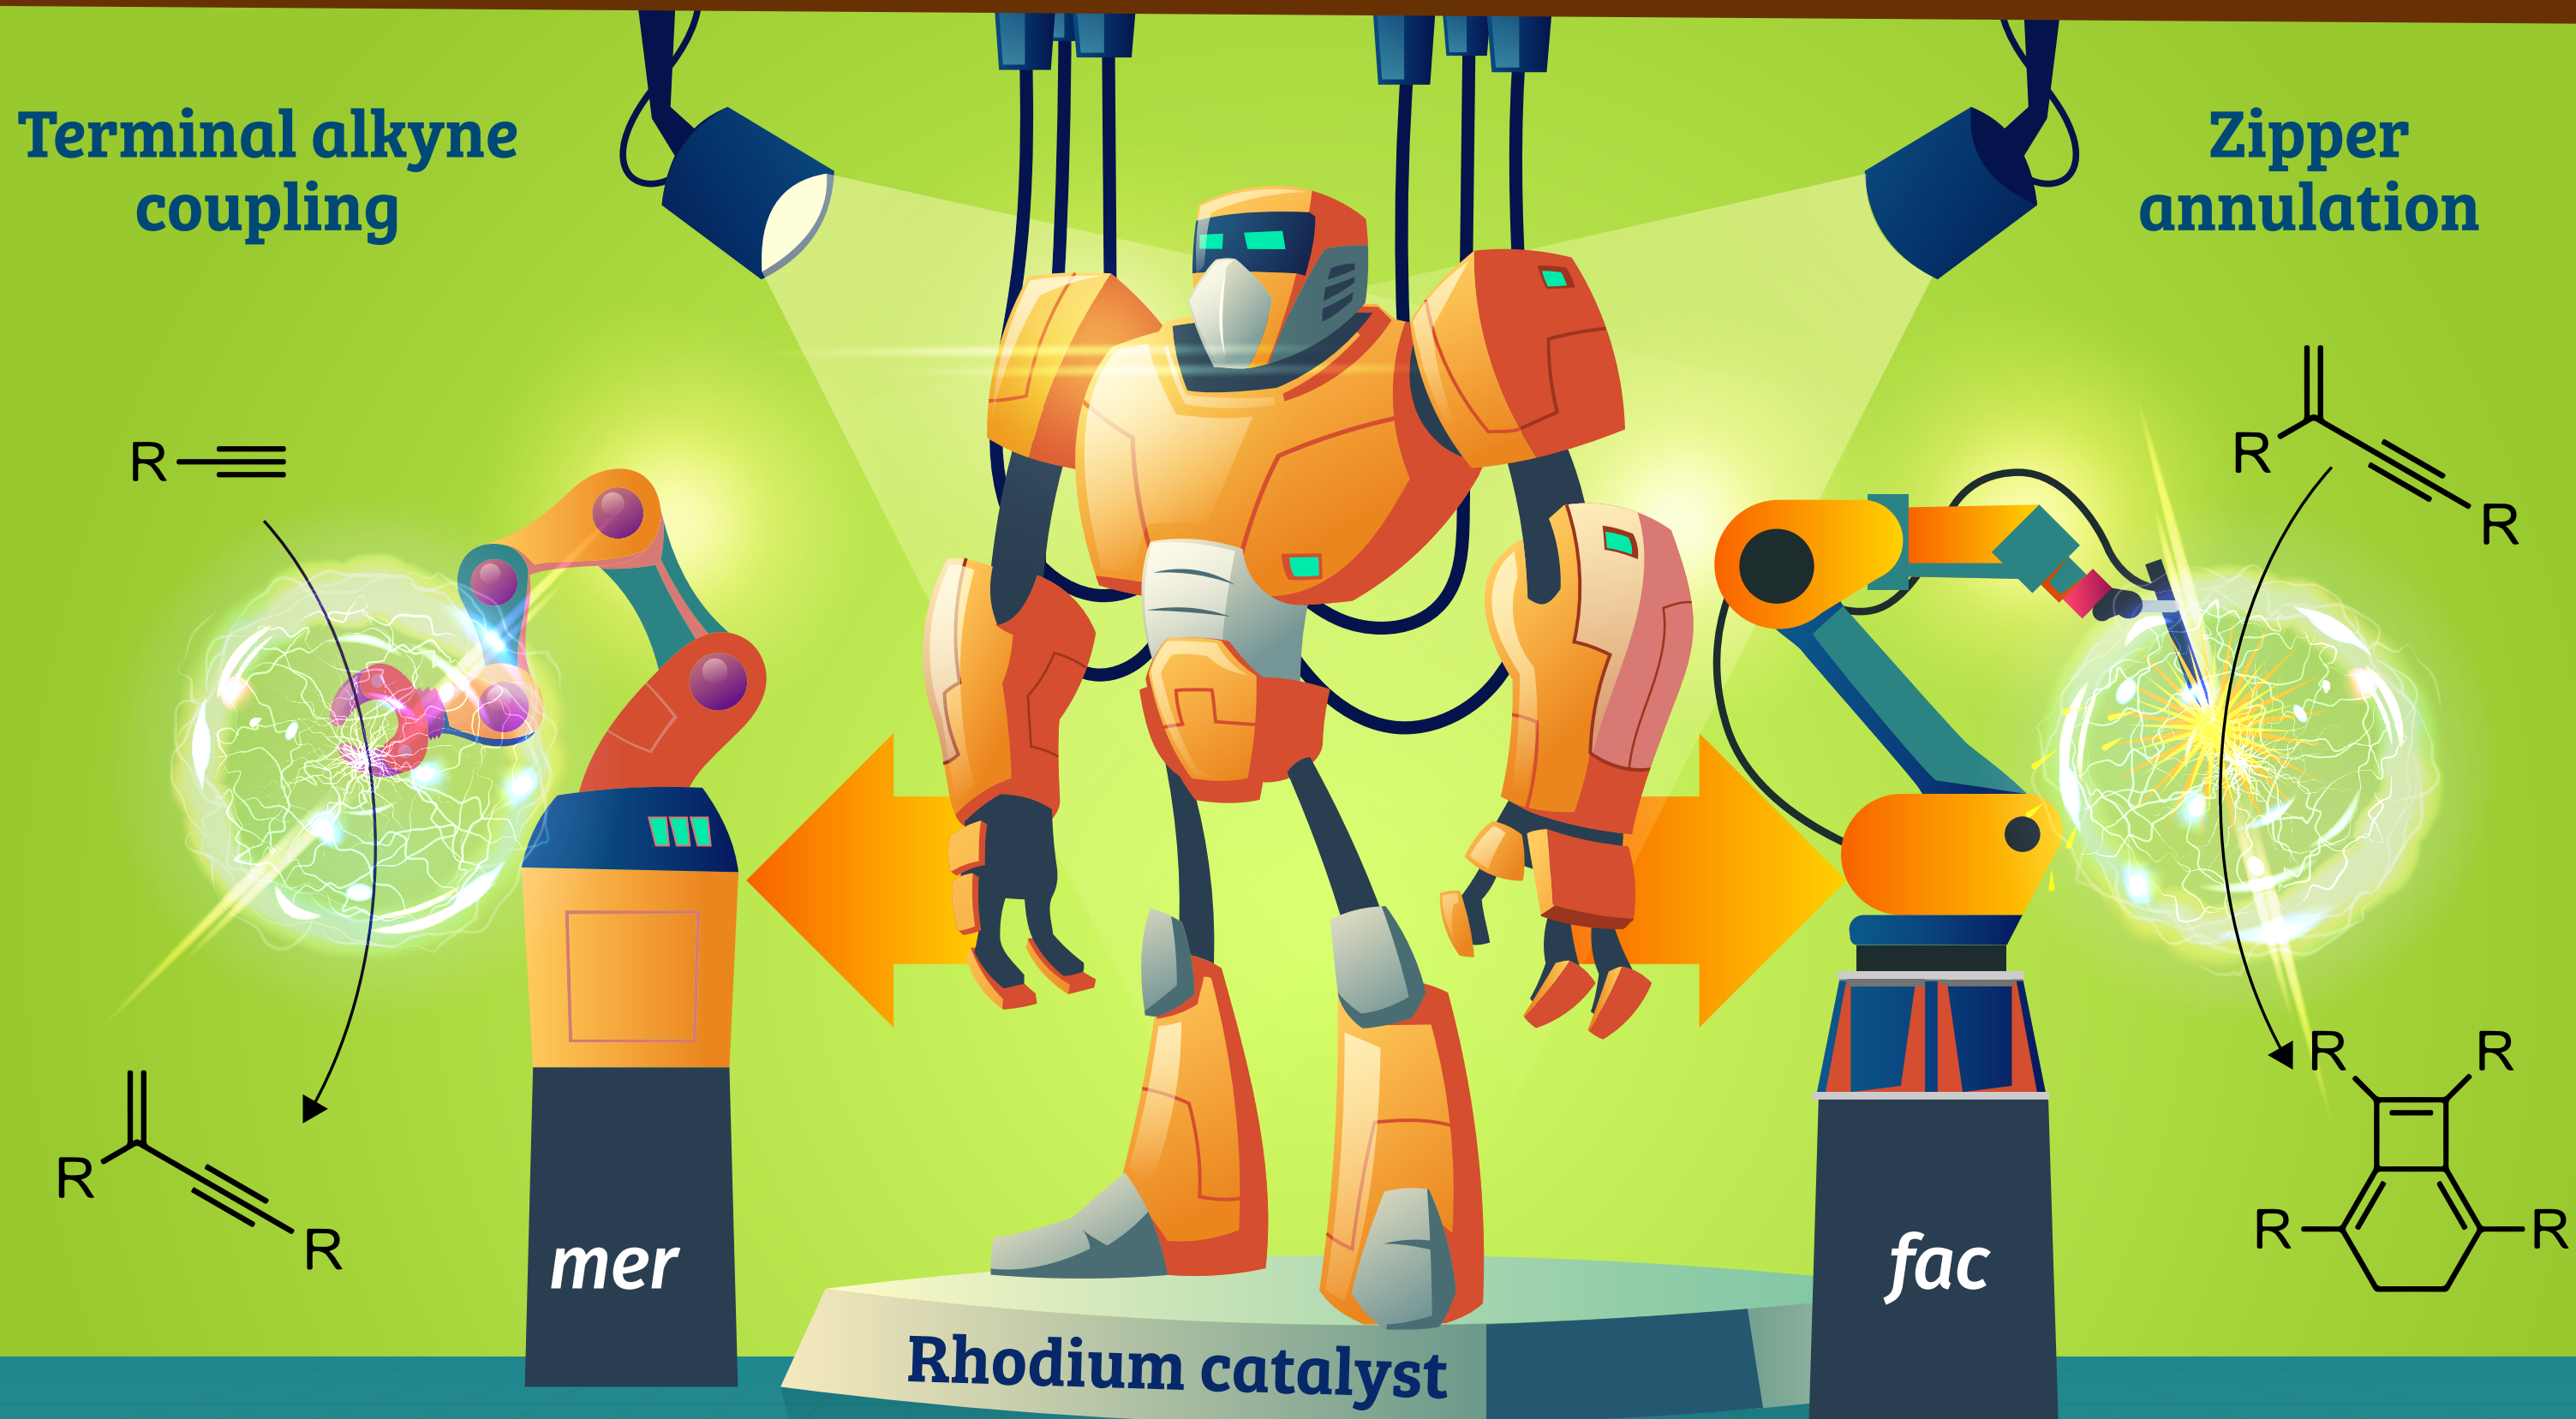

**By changing its shape, the rhodium catalyst promotes two unrelated reactions, one after the other, enabling the construction of a complex hydrocarbon with high atom efficiency and only one experimental operation**

**Chemical  
Science**

A Shape Changing Tandem Rh(CNC) Catalyst:  
Preparation of Bicyclo  
[4.2.0]octa-1,5,7-trienes From Terminal Aryl Alkynes  
Chaplin *et al.* (2020) | DOI: 10.1039/C9SC06153C

 ROYAL SOCIETY  
OF CHEMISTRY
